# Supplementary material
Source: PubMed Central journal article supplement (PMC6583059)
Supplement: jamaneurol-76-755-s003.pdf [file jamaneurol-76-755-s003.pdf]

## **Data Sharing Statement**

Kwok. Effects of Mindfulness Yoga vs Stretching and Resistance Training Exercises on Anxiety and Depression for People With Parkinson Disease. *JAMA Neurol*. Published April 08, 2019. 10.1001/jamaneurol.2019.0534

### **Data**

**Data available:** No
